# Supplementary material
Source: publisher figshare collection journal article supplement (https://acs.figshare.com/ndownloader/files/3776182)
Supplement: Supplementary file 1 [file 3776182]

## Supporting Information

### Induction of cell death in mesothelioma cells by magnetite nanoparticles

Shofu Matsuda <sup>†</sup>, Airi Hitsuji <sup>†</sup>, Takuya Nakanishi <sup>†</sup>, Hong Zhang <sup>†</sup>, Akane Tanaka <sup>‡</sup>, Hiroshi Matsuda <sup>‡</sup>, Tetsuya Osaka <sup>\*,†</sup>

<sup>†</sup> *Graduate School of Advanced Science and Engineering, Waseda University, 3-4-1 Okubo, Shinjuku-ku, Tokyo 169-8555, Japan*

<sup>‡</sup> *Division of Animal Life Science, Institute of Agriculture, Tokyo University of Agriculture and Technology, 3-8-1, Harumi-cho, Fuchu, Tokyo 183-0057, Japan*

The list of Supporting Information is as follows.

- Morphology of MSTO-211H cells incubated for 24 h with MNPs at a dose of 800  $\mu\text{g}$  to  $5 \times 10^5$  cells. (Figure S1, Page S1)
- Characterization of MSTO-211H cells without the addition of MNPs: the incubation time-dependence of cell productivity (A) and the fluorescent image of rhodamine phalloidin stained cells (B). (Figure S2, Page S2)
- Dependence of the percentage of non-viable MSTO-211H cells on the incubation time at a dose of 800  $\mu\text{g}$  of MNPs (diamonds) and without MNPs (circles) in  $5 \times 10^5$  cells. (Figure S3, Page S3)

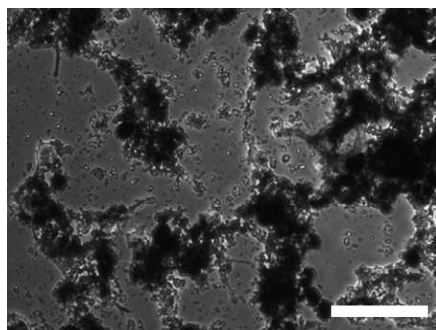

**Figure S1.** Morphology of MSTO-211H cells incubated for 24 h with MNPs at a dose of 800  $\mu\text{g}$  to  $5 \times 10^5$  cells. Scale bar: 50  $\mu\text{m}$ .

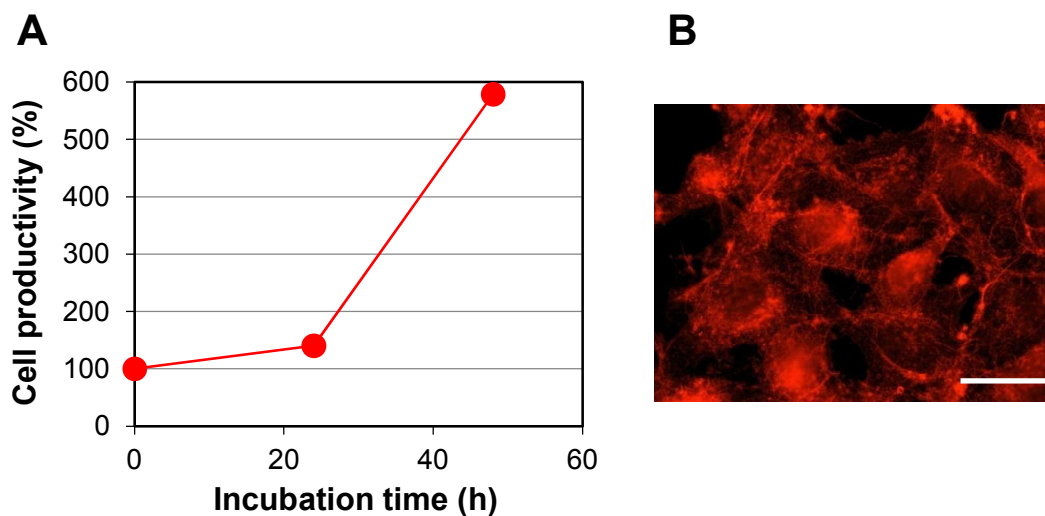

**Figure S2.** Characterization of MSTO-211H cells without the addition of MNPs: the incubation time-dependence of cell productivity (A) and the fluorescent image of rhodamine phalloidin stained cells (B). Scale bar 25  $\mu\text{m}$ .

As shown Figure S2A, the number of MSTO-211H cells was kept almost constant at the incubation time from 0 to 24 h, then increased drastically at the incubation time between 24 and 48 h. This cell-growth behavior suggests that these cells were normal and healthy and the experiment was carried out at the proper period in the cell cycle. Moreover, we investigated the actin-stain using an F-Actin Visualization Biochem Kit™ (Cytoskeleton, Inc.). As shown Figure S2B, the actin stress fibers existed throughout the cell before the addition of MNPs, suggesting that the cell condition is preferable to the experiment.

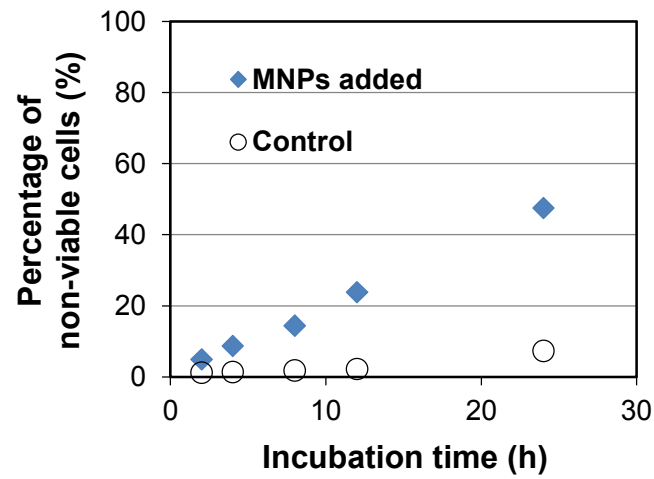

**Figure S3.** Dependence of the percentage of non-viable MSTO-211H cells on the incubation time at a dose of 800  $\mu\text{g}$  of MNPs (diamonds) and without MNPs (circles) in  $5 \times 10^5$  cells.
